# Supplementary material for: Fabricating an anionic polyacrylamide (APAM) with an anionic block structure for high turbidity water separation and purification
Source: Royal Society of Chemistry journal article supplement (doi:10.1039/c7ra05151d), 2017-01-01
Supplement: c7ra05151d1.pdf [file c7ra05151d1.pdf]

## Cover Page for Supporting Information

# Fabricating an anionic polyacrylamide (APAM) with an anionic block structure for high turbidity water separation and purification

Li Feng<sup>a,b</sup>, Huaili Zheng<sup>a,b\*</sup>, Baoyu Gao<sup>c</sup>, Shixin Zhang<sup>a,b</sup>, Chuanliang Zhao<sup>a,b</sup>, Yuhao Zhou<sup>a,b</sup>,  
Bincheng Xu<sup>a,b</sup>

Total number of pages (including the cover page): 2 pages

This file contains 1 Text and 2 Figures.

### Contents:

**Text S1.** Huggins equation for molecular weight of the polymer.

**Fig. S1.** The morphology of the flocs conditioned by TPAS.

**Fig. S2.** The morphology of the flocs conditioned by APAS.

**Text S1.** Huggins equation for molecular weight of the polymer.

**Molecular weight( $M_r$ ):**

$$M_r = 802 \cdot [\eta]^{1.25}$$

Where  $[\eta]$  is the intrinsic viscosity of the polymer.

**Figures**

**Fig. S1**

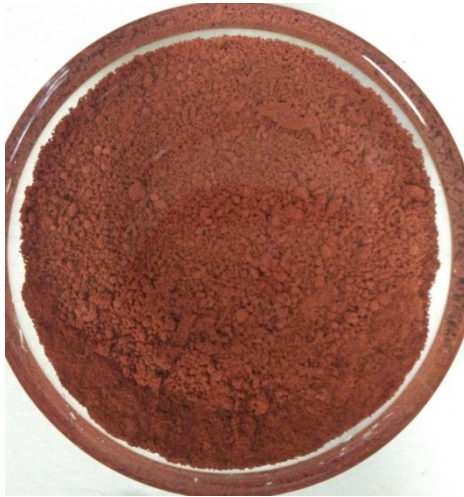

Fig. S 1. The morphology of the flocs conditioned by TPAS.

**Fig. S2**

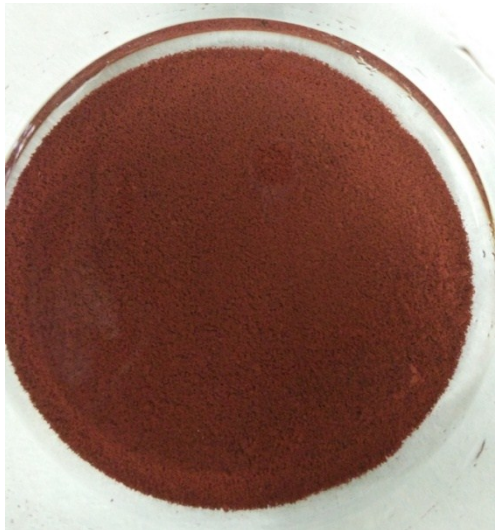

Fig. S 2. The morphology of the flocs conditioned by APAS.
